# Supplementary material for: Transient Agarose Spot (TAS) Assay: A New Method to Investigate Cell Migration
Source: MDPI journal article supplement (doi:10.3390/ijms23042119), 2022-02-14
Supplement: s1 [file s1]

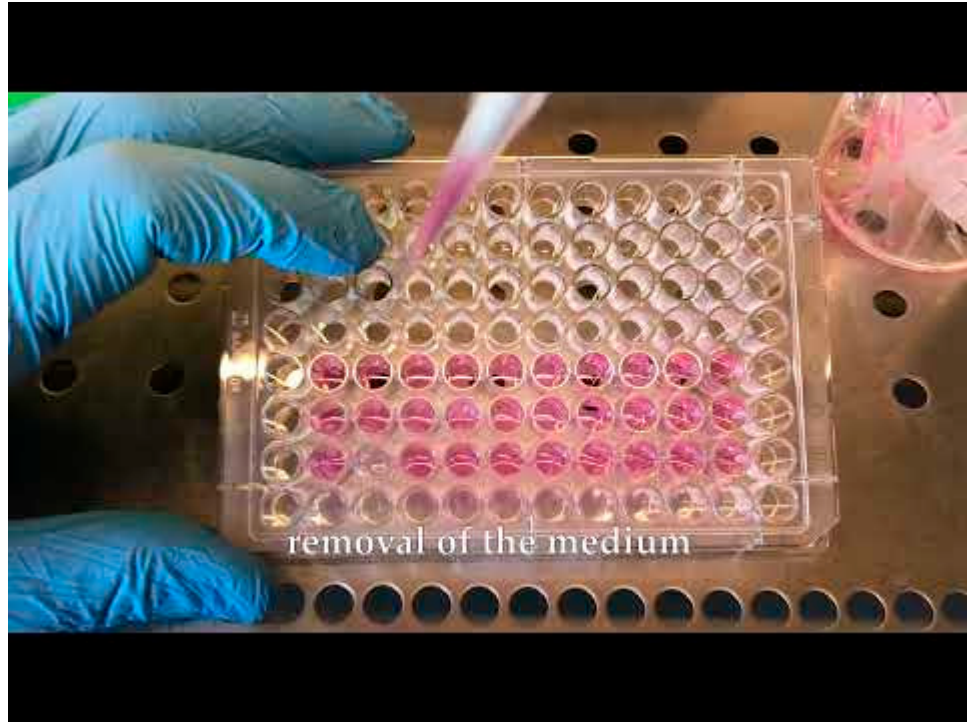

**Video S1.** Instructional video (<https://youtu.be/nAl1QWpJrAl>)

**Table S1.** Human genes involved in fibroblast-related biological processes based on Gene Ontology (GO) database (release date 2021-12-15).

| GO term                                           | Gene                                                                                                                                                                                                                                                                                                                                                                                                                                                                                                                                                                                                                 |
|---------------------------------------------------|----------------------------------------------------------------------------------------------------------------------------------------------------------------------------------------------------------------------------------------------------------------------------------------------------------------------------------------------------------------------------------------------------------------------------------------------------------------------------------------------------------------------------------------------------------------------------------------------------------------------|
| fibroblast migration<br>(GO:0010761)              | <i>TGFB1, HAS1, PTK2, CCN3, AKT1, ZFAND5, CYGB, PIP5K1A, PAK3, ARHGAP4, THBS1, PML, FGF2, ARHGEF7, TMEM201, DDR2, PDLIM1, RAC1, IQGAP1, PLEC, HYAL2, PRKCE, ITGB1BP1, ILK, DMTN, LAMTOR2, SGPL1, BAG4, ITGB1, ACTA2, MAC1R, SLC8A1, ARID5B, hsa-miR-145-5p, hsa-miR-124-3p, hsa-miR-146b-5p, AKAP12</i>                                                                                                                                                                                                                                                                                                              |
| fibroblast proliferation<br>(GO:0048144)          | <i>PEX2, PDGFB, MYC, NF1, PARP10, WAPL, NGFR, AGT, MED25, CDK4, CDK6, LTA, CCNB1, CDC6, DAB2IP, ESR1, FOSL2, LIG4, NUPR1, MED31, DHX9, GSTP1, SKI, COL3A1, PDGFC, NDUFS4, PAWR, FBXO4, PML, E2F1, DDR2, JUN, C1QL4, WNT5A, TP53, WNT1, PDGFRA, CDKN1A, S100A6, SFRP1, RNASEH2B, EREG, EMD, IGF1, CDC73, MORC3, PLA2G1B, IFI30, BMI1, CTNNA1, FGF10, CD74, WNT2, PDGFD, FTH1, MIF, AQP1, FN1, CTC1, WNT7B, SOD2, IL13, SPHK1, PDGFRB, PDGFA, NLRC3, TRIM32, BAX, SIRT6, CD300A, CCNA2, ZMIZ1, DACH1, ZMPSTE24, TP53INP1, EGFR, ABL1, B4GALT7, hsa-miR-17-3p, hsa-miR-494-3p, hsa-miR-155-5p, hsa-miR-124-3p, GAS6</i> |
| extracellular matrix organization<br>(GO:0030198) | <i>TGFB1, LOX, HAS2, MMP19, HAS1, CTSK, LOXL2, ERCC2, MPZL3, NF1, COL8A1, HSD17B12, IER3IP1, CARMIL2, GSN, LAMC1, TGFBI, TNXB, POMT1, SOX9, CCN1, PHLDB2, LAMB2, NTN4, COL1A2, SPOCK2, RIC1, COL16A1, COL4A4, C6orf15, COL9A1, CST3, AGT, ADAMTS14, EGFLAM, TLL2, NFKB2, COL28A1, CTSG, ADAMTS18, LAMB3, ITGA8, IBSP, FKBP10, LAMB4, SERPINB5, ADAMTSL4, LUM, NPNT, VIT, TNF, HPN, MMP12, COL12A1, FOXC2, COL22A1, HPSE2, TLL1, CRTAP, ANGPTL7, MMP28, MPV17, LTBP3, ADAMTS8, THSD4, MMP26, ST7, ADAMTSL5, COL4A5, RUNX1, SPINT2, COMP, CCN2, CLASP2, SERAC1, FLOT1, MMP25, ENG, MMP23B, ATXN1L, WT1, COL24A1,</i>   |

MMP10, MMP7, TNFRSF1A, FAP, PLOD3, GREM1, COL4A1, COL3A1, COL2A1, COL1A1, FERMT1, IMPG1, NPHS1, FBLN2, BMP2, KLK7, ADAMTS5, RGCC, LOXL4, FGFR4, CPB2, GAS2, ADAMTS10, PRSS2, CYP1B1, MIA, LAMB1, MMP8, FMOD, NID2, ANTXR1, VWA1, COL11A1, FSCN1, ADAMTS6, ADAMTS7, MMP20, SPINK5, RIC8A, TNFRSF1B, DDR2, MARCOL, IMPG2, MMP9, COL4A2, TMPRSS6, CHADL, TGFB1, COLGALT2, EXOC8, PDPN, HAS3, PXDN, CRISPLD2, MMP16, MMP15, LOXL3, COL10A1, POSTN, RXFP1, COL6A5, SCX, QSOX1, CSGALNACT1, TNFRSF11B, APLP1, PDGFRA, ADAMTS19, ADAMTS15, ADAMTS16, ADAMTS17, ADAMTS12, MMP21, TNFR, COL14A1, P3H4, CAV2, COL23A1, MMP2, MMP3, MFAP4, TGFB2, ECM2, ELANE, CLASP1, FBLN1, KIF9, EGFL6, AEBP1, PHLDB1, ELF3, TPSAB1, RB1, COL13A1, NOX1, TCF15, SERPINH1, GFAP, CAPG, HAPLN2, BMP1, OTOL1, SMPD3, B4GALT1, MYH11, DAG1, SLC39A8, LCP1, VIPAS39, CFLAR, LRP1, SERPINF2, SPINT1, ABI3BP, DPT, WDR72, MELTF, RAMP2, MYO1E, FOXF2, FOXF1, COL6A6, COL11A2, COL9A2, COL9A3, P4HA1, ADAM10, GPM6B, ADAM15, CAV1, CTSV, PRDX4, OLFML2B, OLFML2A, ADAMTS13, CCDC80, MMP11, NOTCH1, MYF5, PTX3, ADAMTSL2, FURIN, WNT3A, KAZALD1, COL4A3, DMP1, CMA1, MMP14, LOXL1, DDR1, ADAMTS3, ADAM8, NID1, SH3PXD2B, TMEM38B, MMP13, NTNG2, EMILIN1, COLQ, OPTC, SMAD3, COLGALT1, MMP27, ELN, CTSS, ADTRP, IL6, PRDM5, FLRT2, PBXIP1, KLK5, ADAMTS2, COL5A3, NTNG1, PAPLN, SULF1, SULF2, MMP24, KLK4, COL19A1, COL18A1, COL15A1, ADAMTS20, EXT1, RECK, EFEMP2, COL5A2, PLG, PRSS1, HMCN1, NR2E1, CREB3L1, SLC2A10, ITGB1, GFOD2, ATP7A, NOXO1, COL17A1, COL5A1, TNXA, ABL1, BCL3, DPP4, ADAMTS9, COL8A2, DNAJB6, ADAMTS4, ADAMTS1, COL4A6, TIE1, IHH, ERO1A, SFRP2, ADAMTSL3, FBLN5, ZNF469, SMOC2, MMP17, NDNF, hsa-miR-98-5p, hsa-miR-29b-3p, tenascin-x\_human, COL27A1, WASHC1, GAS6, SMOC1, MMP1, APP, FOXC1

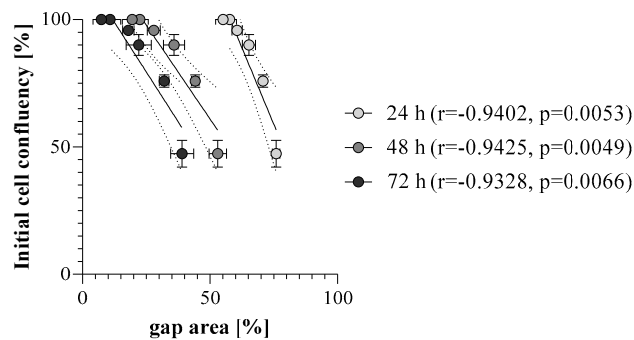

**Figure S1.** Correlation of cell density and gap closure. To determine optimal cell count, TAS migration assay was performed on MRC-5 cells. Correlations between initial cell confluency and gap areas at 24, 48 and 72 hours were determined by Pearson's coefficients (r).

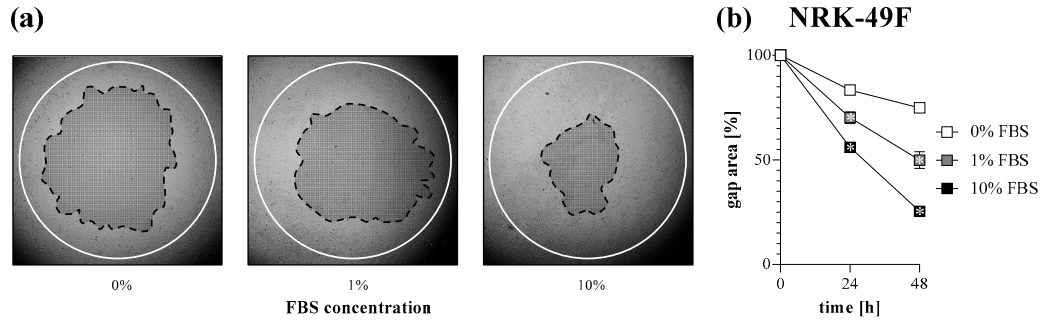

**Figure S2.** Effect of FBS treatment on cell migration of renal fibroblasts. To determine the effect of serum addition, TAS assay was performed on NRK-49F cells. **(a)** Cell-free zone areas were analysed graphically after brightfield microscopy. Lines in representative images indicate the gap edges at 0 (white) and 48 (black) hours after gel removal. **(b)** The gap closure was monitored for 48 hours after gel removal. Results are presented as mean  $\pm$  SD ( $n = 8$ ). \*  $p < 0.05$  vs. 0% FBS at the concerning time (two-way ANOVA).

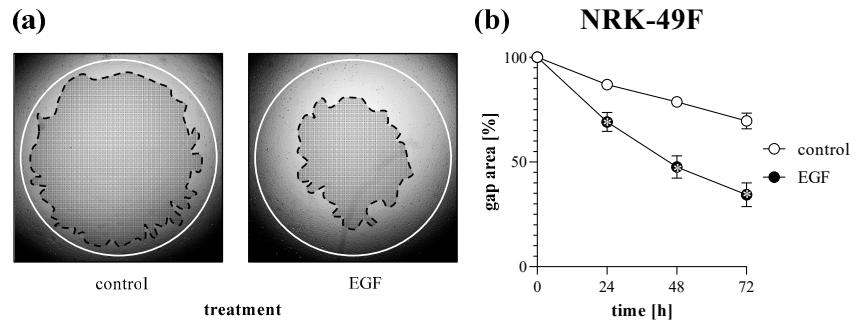

**Figure S3.** Effect of growth factor treatment on cell migration of renal fibroblasts. To determine the effect of EGF treatment, TAS assay was performed on NRK-49F cells. **(a)** Cell-free zone areas were analysed graphically after brightfield microscopy. Lines in representative images indicate the gap edges at 0 (white) and 48 (black) hours after gel removal. **(b)** The gap closure was monitored for 72 hours after gel removal. Results are presented as mean  $\pm$  SD ( $n = 8$ ). \*  $p < 0.05$  vs. 0% control at the concerning time (two-way ANOVA).

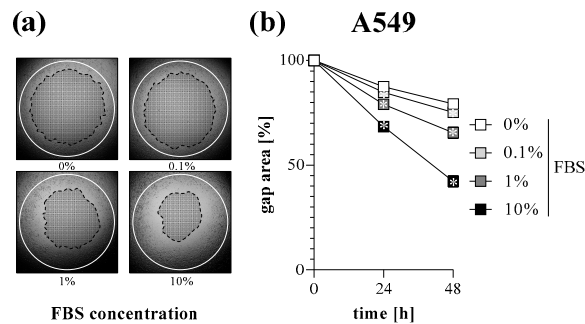

**Figure S4.** Effect of FBS treatment on wound healing of lung epithelial cells. To determine the effect of serum addition, TAS assay was performed on A549 cells. **(a)** Cell-free zone areas were analysed graphically after brightfield microscopy. Lines in representative images indicate the gap edges at 0 (white) and 48 (black) hours after gel removal. **(b)** The gap closure was monitored for

48 hours after gel removal. Results are presented as mean  $\pm$  SD ( $n = 8$ ). \*  $p < 0.05$  vs. 0% FBS at the concerning time (two-way ANOVA).

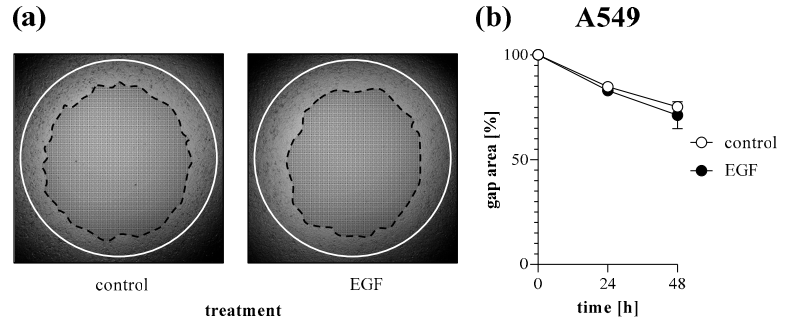

**Figure S5.** Effect of growth factor treatment on wound healing of lung epithelial cells. To determine the effect of EGF treatment, TAS assay was performed on A549 cells. **(a)** Cell-free zone areas were analysed graphically after brightfield microscopy. Lines in representative images indicate the gap edges at 0 (white) and 48 (black) hours after gel removal. **(b)** The gap closure was monitored for 48 hours after gel removal. Results are presented as mean  $\pm$  SD ( $n = 8$ ). \*  $p < 0.05$  vs. 0% control at the concerning time (two-way ANOVA).

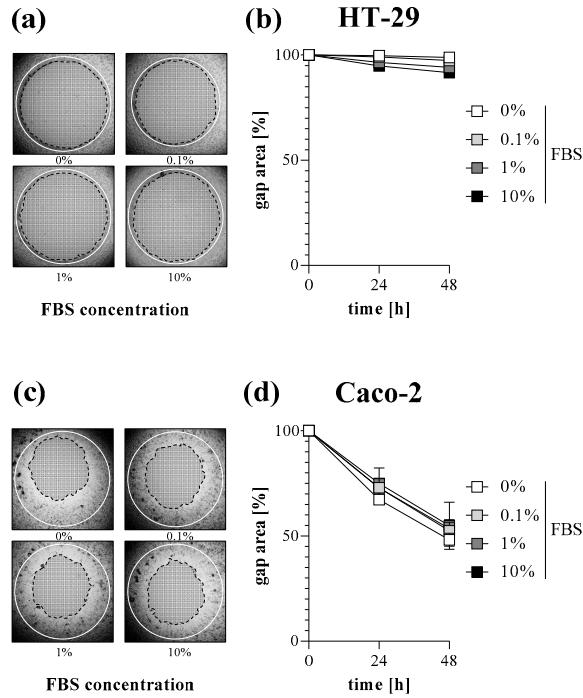

**Figure S6.** Effect of FBS treatment on the invasion of cancer cells. To determine the effect of serum addition, TAS assay was performed on **(a, b)** HT-29 and **(c, d)** Caco-2 cells. **(a, c)** Cell-free zone areas were analysed graphically after brightfield microscopy. Lines in representative images indicate the gap edges at 0 (white) and 48 (black) hours after gel removal. **(b, d)** The gap closure was monitored for 48 hours after gel removal. Results are presented as mean  $\pm$  SD ( $n = 8$ ). \*  $p < 0.05$  vs. 0% FBS at the concerning time (two-way ANOVA).

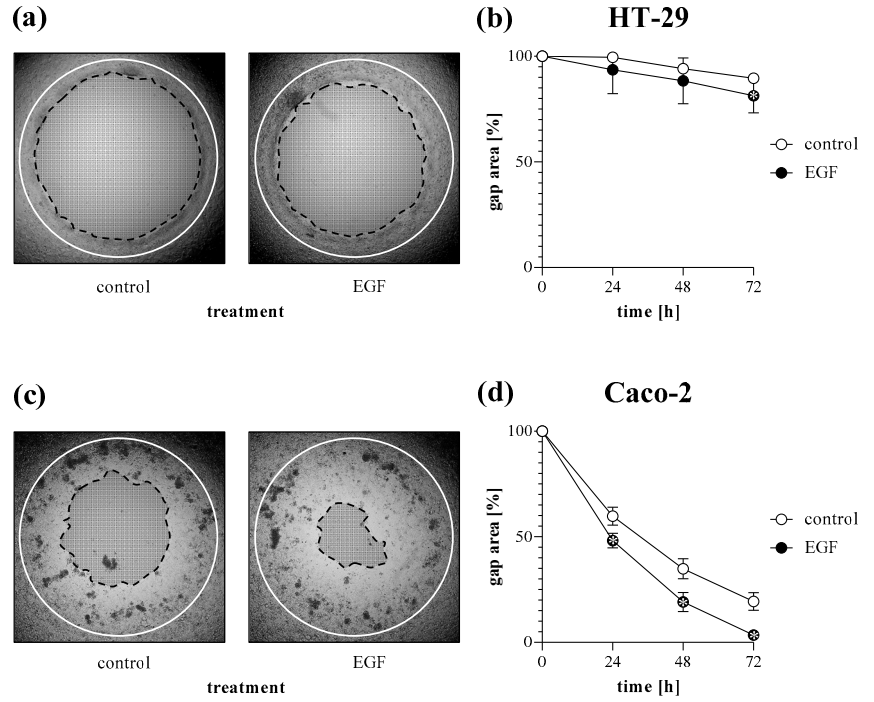

**Figure S7.** Effect of growth factor treatment on the invasion of cancer cells. To determine the effect of EGF treatment, TAS assay was performed on (a, b) HT-29 and (c, d) Caco-2 cells. (a, c) Cell-free zone areas were analysed graphically after brightfield microscopy. Lines in representative images indicate the gap edges at 0 (white) and 48 (black) hours after gel removal. (b, d) The gap closure was monitored for 72 hours after gel removal. Results are presented as mean  $\pm$  SD ( $n = 8$ ). \* $p < 0.05$  vs. 0% control at the concerning time (two-way ANOVA).

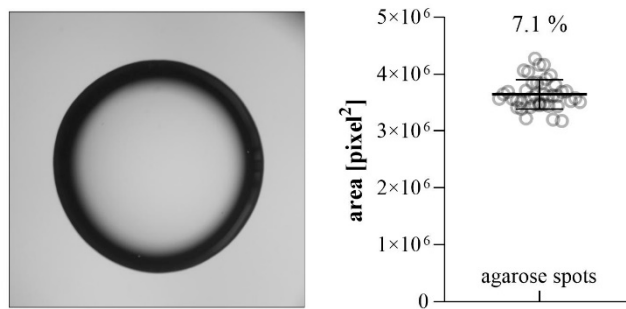

**Figure S8.** Reproducibility agarose dropping. Consistency of agarose spot sizes were determined by graphical analysis ( $n = 40$ ). Percentage values indicate the coefficient variation of received area.
